# Supplementary material
Source: publisher figshare collection journal article supplement (https://acs.figshare.com/ndownloader/files/5200333)
Supplement: Supplementary file 1 [file 5200333]

## Supporting Information

### Isolation, Characterization, and Reaction of Activated Iodosylbenzene Monomer Hydroxy(phenyl)iodonium Ion with Hypervalent Bonding: Supramolecular Complex $\text{PhI}^+\text{OH}\cdot 18\text{-Crown-6}$ with Secondary $\text{I}\cdots\text{O}$ Interactions

Masahito Ochiai, Kazunori Miyamoto, Motoo Shiro, Tomoyuki Ozawa, and Kentaro Yamaguchi

*Faculty of Pharmaceutical Sciences, University of Tokushima, 1-78 Shomachi, Tokushima 770-8505, Japan, Rigaku Corporation, 3-9-12 Matsubara, Akishima, Tokyo 196-8666, Japan, and Chemical Analysis Center, Chiba University, Yayoi-cho, Inage-ku, Chiba 263-8522, Japan*

**Preparation of  $\text{PhI}(\text{OH})\text{BF}_4\cdot 18\text{-Crown-6}$  Complex.** To a stirred suspension of iodosylbenzene (165 mg, 0.75 mmol) and 18-crown-6 (199 mg, 0.75 mmol) in dichloromethane (4.2 mL) was added dropwise tetrafluoroboric acid-dimethyl ether complex (111 mg, 0.83 mmol) at  $-78^\circ\text{C}$  under nitrogen and the mixture was warmed to  $0^\circ\text{C}$  over 3.5 h. After filtration, dichloromethane was evaporated under an aspirator vacuum at  $0^\circ\text{C}$  to give an oil, which was washed several times with hexane and then with diethyl ether by decantation at  $-60$  to  $-40^\circ\text{C}$  to give a pure  $\text{PhI}(\text{OH})\text{BF}_4\cdot 18\text{-crown-6}$  complex (435 mg, 100%) as a yellow powder. Recrystallization of the complex (200 mg) from acetone-hexane at  $-30^\circ\text{C}$  gave bright yellow prisms (35 mg): some decomposition of the complex was observed during the recrystallization at  $-30^\circ\text{C}$ . Mp  $88\text{--}93^\circ\text{C}$  (decomposition); IR (Nujol) 3533, 2471, 1567, 1353, 1300, 1245, 1150-1000, 955, 836, 750,  $611\text{ cm}^{-1}$ ;  $^1\text{H}$  NMR (400 MHz,  $\text{CD}_3\text{CN}$ )  $\delta$  8.26 (d,  $J = 8.1$  Hz, 2H), 8.01 (br s, 1H), 7.81 (t,  $J = 7.3$  Hz, 1H), 7.67 (dd,  $J = 8.1, 7.3$  Hz, 2H), 3.64 (s, 24H);  $^{13}\text{C}$  NMR (75 MHz,  $\text{CD}_3\text{CN}$ )  $\delta$  136.4, 134.5, 132.4, 123.1, 70.7. Anal. Calcd for  $\text{C}_{18}\text{H}_{30}\text{BF}_4\text{IO}_7$ : C, 37.85; H, 5.12. Found: C, 37.52; H, 5.11.

**Oxidation of 1-Naphthol.** To a stirred solution of  $\text{PhI}(\text{OH})\text{BF}_4\cdot 18\text{-crown-6}$  (67 mg, 0.12 mmol) in water (4 mL) was added 1-naphthol (8.1 mg, 0.056 mmol) at  $0^\circ\text{C}$  under nitrogen and the mixture was gradually warmed to room temperature over 3 h. The mixture was diluted with water and extracted with dichloromethane. The extract was dried over  $\text{Na}_2\text{SO}_4$  and concentrated under aspirator vacuum to give an oil, which was purified by preparative TLC ( $\text{SiO}_2$ , hexane-ethyl acetate 7:3) to give naphthoquinone (**3**) (6 mg, 67%):  $^1\text{H}$  NMR (400 MHz,  $\text{CDCl}_3$ )  $\delta$  8.10 (dd,  $J = 5.9, 3.3$  Hz, 2H), 7.77 (dd,  $J = 5.9, 3.3$  Hz, 2H), 6.99 (s, 2H).

**Oxidation of 2,4,6-Trimethylphenol.** To a stirred solution of  $\text{PhI}(\text{OH})\text{BF}_4\cdot 18\text{-crown-6}$  (51 mg, 0.089 mmol) in water (3 mL) was added 2,4,6-trimethylphenol (10 mg, 0.074 mmol) at  $0^\circ\text{C}$  under nitrogen and the mixture was gradually warmed to room temperature over 3 h. The mixture was diluted with water and extracted with dichloromethane. The extract was dried over  $\text{Na}_2\text{SO}_4$  and concentrated under aspirator vacuum to give an oil, which was purified by preparative TLC ( $\text{SiO}_2$ , hexane-ethyl acetate 7:3) to give 4-hydroxy-2,4,6-trimethylcyclohexa-2,5-dienone (**4**) (10.4 mg, 92%):  $^1\text{H}$  NMR (400 MHz,  $\text{CDCl}_3$ )  $\delta$  6.62 (s, 2H), 1.88 (s, 6H), 1.85 (s, 1H), 1.45 (s, 3H).

**Oxidation of Thioanisole.** To a stirred solution of  $\text{PhI}(\text{OH})\text{BF}_4\cdot 18\text{-crown-6}$  (48 mg, 0.084 mmol) in water (3 mL) was added thioanisole (8.5 mg, 0.068 mmol) at room temperature under nitrogen and the mixture was stirred for 3 h. After addition of  $\text{NaCl}$ , the mixture was extracted with dichloromethane. The extract was dried over  $\text{Na}_2\text{SO}_4$  and concentrated under aspirator vacuum to give an oil, which was purified by preparative TLC ( $\text{SiO}_2$ , ethyl acetate) to give methyl phenyl sulfoxide (**5**) (9.4 mg, 98%) as

a colorless oil:<sup>3</sup> <sup>1</sup>H NMR (400 MHz, CDCl<sub>3</sub>) 7.66 (br d, *J* = 7.2 Hz, 2H), 7.57-7.48 (m, 3H), 2.74 (s, 3H).

**Oxidation of Chalcone.** To a stirred solution of PhI(OH)BF<sub>4</sub>·18-crown-6 (31 mg, 0.054 mmol) in MeOH (1.5 mL) was added chalcone (10 mg, 0.049 mmol) at room temperature under nitrogen and the mixture was stirred for 18 h. The mixture was diluted with water and extracted with dichloromethane. The extract was dried over Na<sub>2</sub>SO<sub>4</sub> and concentrated under aspirator vacuum to give an oil, which was purified by preparative TLC (SiO<sub>2</sub>, hexane-ethyl acetate 7:3) to give 3,3-dimethoxy-1,2-diphenylpropan-1-one (**6**) (9.5 mg, 72%):<sup>4</sup> <sup>1</sup>H NMR (400 MHz, CDCl<sub>3</sub>) 7.98 (d, *J* = 7.7 Hz, 2H), 7.51 (t, *J* = 7.3 Hz 1H), 7.46-7.38 (m, 4H), 7.31 (dd, *J* = 7.7, 7.3 Hz, 2H), 7.28-7.21 (1H), 5.14 (d, *J* = 8.8 Hz, 1H), 4.92 (d, *J* = 8.8 Hz, 1H), 3.45 (s, 3H), 3.22 (s, 3H).

**Oxidation of Styrene.** To a stirred solution of PhI(OH)BF<sub>4</sub>·18-crown-6 (33 mg, 0.058 mmol) in MeOH (1 mL) was added styrene (5.4 mg, 0.052 mmol) at 0 °C under nitrogen, and the mixture was stirred for 1.5 h at the temperature and then for 11 h at room temperature. The mixture was quenched with a saturated aqueous NaHCO<sub>3</sub> solution at 0 °C and extracted with dichloromethane. The extract was dried over Na<sub>2</sub>SO<sub>4</sub> and concentrated under aspirator vacuum to give an oil, which was purified by preparative TLC (SiO<sub>2</sub>, hexane-ethyl acetate 8:2) to give (2,2-dimethoxyethyl)benzene (**7**) (6.4 mg, 73%) as a colorless oil:<sup>4</sup> <sup>1</sup>H NMR (400 MHz, CDCl<sub>3</sub>) 7.33-7.19 (m, 5H), 4.56 (t, *J* = 5.5 Hz 1H), 3.34 (s, 6H), 2.92 (d, *J* = 5.5 Hz, 2H).

**Oxidation of Indene. (a) Synthesis of *trans*-1,2-Diacetoxyindan (*trans*-**8**).** To a stirred solution of PhI(OH)BF<sub>4</sub>·18-crown-6 (47 mg, 0.082 mmol) in acetic acid (1.5 mL) was added acetic anhydride (35 mg, 0.34 mmol) at room temperature under nitrogen and the mixture was stirred for 2 h. To this mixture was added indene (8.0 mg, 0.068 mmol) at 16 °C and the mixture was stirred for 1 h at the temperature. After addition of water and extraction with dichloromethane, the extract was dried over Na<sub>2</sub>SO<sub>4</sub> and concentrated under aspirator vacuum to give an oil, which was purified by preparative TLC (SiO<sub>2</sub>, hexane-ethyl acetate 7:3) to give *trans*-**8** (14.4 mg, 89%):<sup>5</sup> <sup>1</sup>H NMR (400 MHz, CDCl<sub>3</sub>) 7.40-7.22 (4H), 6.25 (d, *J* = 3.7 Hz 1H), 5.45 (ddd, *J* = 7.1, 4.5, 3.7 Hz, 1H), 3.54 (dd, *J* = 16.4, 7.1 Hz, 1H), 2.90 (dd, *J* = 16.4, 4.5 Hz, 1H), 2.12 (s, 3H), 2.08 (s, 3H). The *trans*-**8** was contaminated with a small amount of *cis* isomer (10%).

**(b) Synthesis of *cis*-1,2-Diacetoxyindan (*cis*-**8**).** To a stirred suspension of PhI(OH)BF<sub>4</sub>·18-crown-6 (48 mg, 0.084 mmol) in dichloromethane (1 mL) and acetic acid (1 mL) was added a solution of indene (8.0 mg, 0.068 mmol) in dichloromethane (1.5 mL) at -20 °C under nitrogen and the mixture was stirred for 1.5 h at the temperature. The mixture was diluted with water and extracted with dichloromethane. The extract was dried over Na<sub>2</sub>SO<sub>4</sub> and concentrated under aspirator vacuum to give an oil, which was purified by preparative TLC (SiO<sub>2</sub>, hexane-ethyl acetate 7:3) to give a 1:1 mixture of regioisomeric *cis*-indan-1,2-diol monoacetates (9.8 mg, 74%).<sup>6</sup> The monoacetates (3.6 mg, 0.019 mmol) were dissolved in acetic anhydride (0.8 mL) and pyridine (0.5 mL) at room temperature and the mixture was stirred for 2 days. Concentration under aspirator vacuum gave pure *cis*-**8** (4.1 mg, 92%):<sup>7</sup> <sup>1</sup>H NMR (400 MHz, CDCl<sub>3</sub>) 7.43-7.21 (4H), 6.22 (d, *J* = 5.5 Hz 1H), 5.54 (dt, *J* = 6.5, 5.5 Hz, 1H), 3.25 (dd, *J* = 15.9, 6.5 Hz, 1H), 3.13 (dd, *J* = 15.9, 5.5 Hz, 1H), 2.09 (s, 3H), 2.07 (s, 3H).

**Oxidation of Silyl Enol Ether (**11**). (a) In Acetonitrile-Water.** To a stirred solution of PhI(OH)BF<sub>4</sub>·18-crown-6 (25 mg, 0.043 mmol) in acetonitrile (0.5 mL) and water (0.5 mL) was added a solution of 1-phenyl-1-(trimethylsilyloxy)ethylene (**11**) (7.5 mg, 0.039 mmol) in acetonitrile (1 mL) at 0 °C under nitrogen and the mixture was stirred for 1 h. The mixture was diluted with water and extracted with dichloromethane. The extract was dried over Na<sub>2</sub>SO<sub>4</sub> and concentrated under aspirator vacuum to give an oil, which was purified by preparative TLC (SiO<sub>2</sub>, hexane-ethyl acetate 7:3) to give the -hydroxy ketone **9** (3.9 mg, 73%):<sup>8</sup> <sup>1</sup>H NMR (400 MHz, CDCl<sub>3</sub>) 7.93 (d, *J* = 8.1 Hz, 2H), 7.64 (t, *J* = 7.3 Hz, 1H), 7.52 (dd, *J* = 8.1, 7.3 Hz, 2H), 4.90 (d, *J* = 4.0 Hz, 2H), 3.51 (t, *J* = 4.0 Hz, 1H).

**(a) Under Solvent-Free Conditions.** To the finely powdered PhI(OH)BF<sub>4</sub>·18-crown-6 (34 mg, 0.06 mmol) was added silyl enol ether **11** (35 mg, 0.18 mmol) at -78 °C under argon and the mixture was gradually warmed to room temperature over 3.5 h. After addition of water, the mixture was extracted

with dichloromethane. The extract was dried over Na<sub>2</sub>SO<sub>4</sub> and concentrated under aspirator vacuum to give an oil, which was purified by preparative TLC (SiO<sub>2</sub>, hexane-ethyl acetate 7:3) to give the 1,4-diphenylbutane-1,4-dione (10.3 mg, 74%) and the -hydroxy ketone **9** (1.2 mg, 15%).<sup>8</sup> 1,4-Diphenylbutane-1,4-dione: <sup>1</sup>H NMR (400 MHz, CDCl<sub>3</sub>) 8.05 (br d, *J* = 7.7 Hz, 4H), 7.59 (br t, *J* = 7.2 Hz, 2H), 7.49 (dd, *J* = 7.7, 7.2 Hz, 4H), 3.48 (s, 4H).

**Synthesis of Alkynyl-λ<sup>3</sup>-iodane·18-crown-6 Complex (10).** To a stirred solution of PhI(OH)BF<sub>4</sub>·18-crown-6 (52 mg, 0.091 mmol) and HgO (0.7 mg, 0.003 mmol) in dichloromethane (1.5 mL) was added 1-decyne (10 mg, 0.072 mmol) at room temperature under nitrogen and the mixture was stirred for 3 h. The mixture was quenched with a saturated aqueous NaBF<sub>4</sub> solution and extracted with dichloromethane. The extract was filtrated and concentrated under aspirator vacuum to give an oil, which was washed several times with hexane and then with diethyl ether by decantation at -78 °C to give 1:1.5 1-decynyl(phenyl)tetrafluoroborato-<sup>3</sup>-iodane·18-crown-6 complex (32.9 mg, 56%). Recrystallization from dichloromethane-diethyl ether-hexane gave the 1:1 complex **10** as colorless needles: mp 91-92 °C; IR (KBr) 3083, 2921, 2181, 1562, 1468, 1354, 1250, 1150-1000, 957, 838, 747, 680 cm<sup>-1</sup>; <sup>1</sup>H NMR (400 MHz, CDCl<sub>3</sub>) 8.10 (d, *J* = 8.4 Hz, 2H), 7.70 (t, *J* = 7.3 Hz, 1H), 7.58 (dd, *J* = 8.4, 7.3 Hz, 2H), 3.66 (s, 24H), 2.64 (t, *J* = 7.3 Hz, 2H), 1.62-1.54 (quint, *J* = 7.3 Hz, 2H), 1.39-1.21 (m, 10H), 0.88 (t, *J* = 7.3 Hz, 3H). Anal. Calcd for C<sub>28</sub>H<sub>46</sub>BF<sub>4</sub>IO<sub>6</sub>: C, 48.57; H, 6.70. Found: C, 48.17; H, 6.56.

## References

- 1) Barret, R.; Daudon, M. *Tetrahedron Lett.* **1990**, *31*, 4871.
- 2) McKillop, A.; McLaren, L.; Taylor, R. J. K. *J. Chem. Soc., Perkin Trans. 1* **1994**, 2047.
- 3) Ochiai, M.; Nakanishi, A.; Ito, T. *J. Org. Chem.* **1997**, *62*, 4253.
- 4) Moriarty, R. M.; Khosrowshahi, J. S.; Prakash, O. *Tetrahedron Lett.* **1985**, *26*, 2961.
- 5) Zhdankin, V. V.; Tykwinski, R.; Berglund, B.; Mullikin, M.; Caple, R.; Zefirov, N. S.; Koz'min, A. S. *J. Org. Chem.* **1989**, *54*, 2609.
- 6) Nakano S.; Igarashi Y.; Nohira H. *Tetrahedron Assym.* **2001**, *12*, 59.
- 7) Imuta, M.; Ziffer, H. *J. Org. Chem.* **1978**, *43*, 4540.
- 8) Moriarty, R. M.; Prakash, O. *Org. React.* **1999**, *54*, 273.

[ Mass Spectrum ]  
 Data : 230418-027 Date : 12-Apr-2003 12:00  
 Sample: KFI-223 in CH3CN  
 Note : 5.0kV, 2.2kV, 30/85V, -20/rtdeg, 1.0uL/h, R-1000  
 Inlet : Direct Ion Mode : ESI+  
 Spectrum Type : Normal Ion [MF-Linear]  
 RT : 2.87 min Scan# : 11,14  
 BP : m/z 465.0330 Int. : 12.18  
 Output m/z range : 0.0000 to 1000.5459 Cut Level : 0.00 %

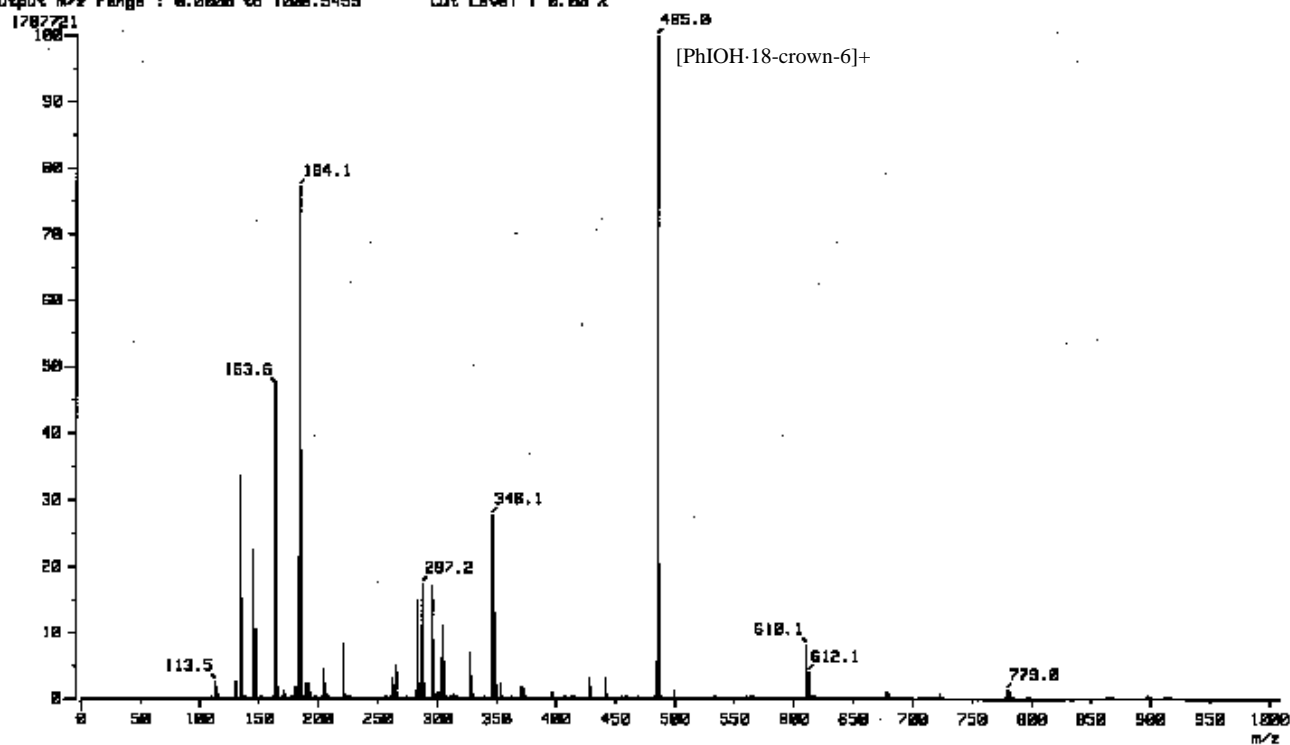

ESI mass spectrum of PhI(OH)BF<sub>4</sub>·18-crown-6 complex in MeCN

[ Mass Spectrum ]  
 Date : 230410-002 Data : 12-Apr-2023 18:18  
 Sample: K01-223 in MeOH  
 Note : 5.0kV, 2.0kV, 48/37V, 7/rtddeg, 1.0mL/h, R=1000  
 Inlet : Direct Ion Mode : -ESI-  
 Spectrum Type : Normal Ion MF-Linear-  
 RT : 3.04 min Scan# : (1,20)  
 BP : m/z 499.0228 Int. : 59.19  
 Output m/z range : 0.0000 to 741.8388 Cut Level : 0.00 %

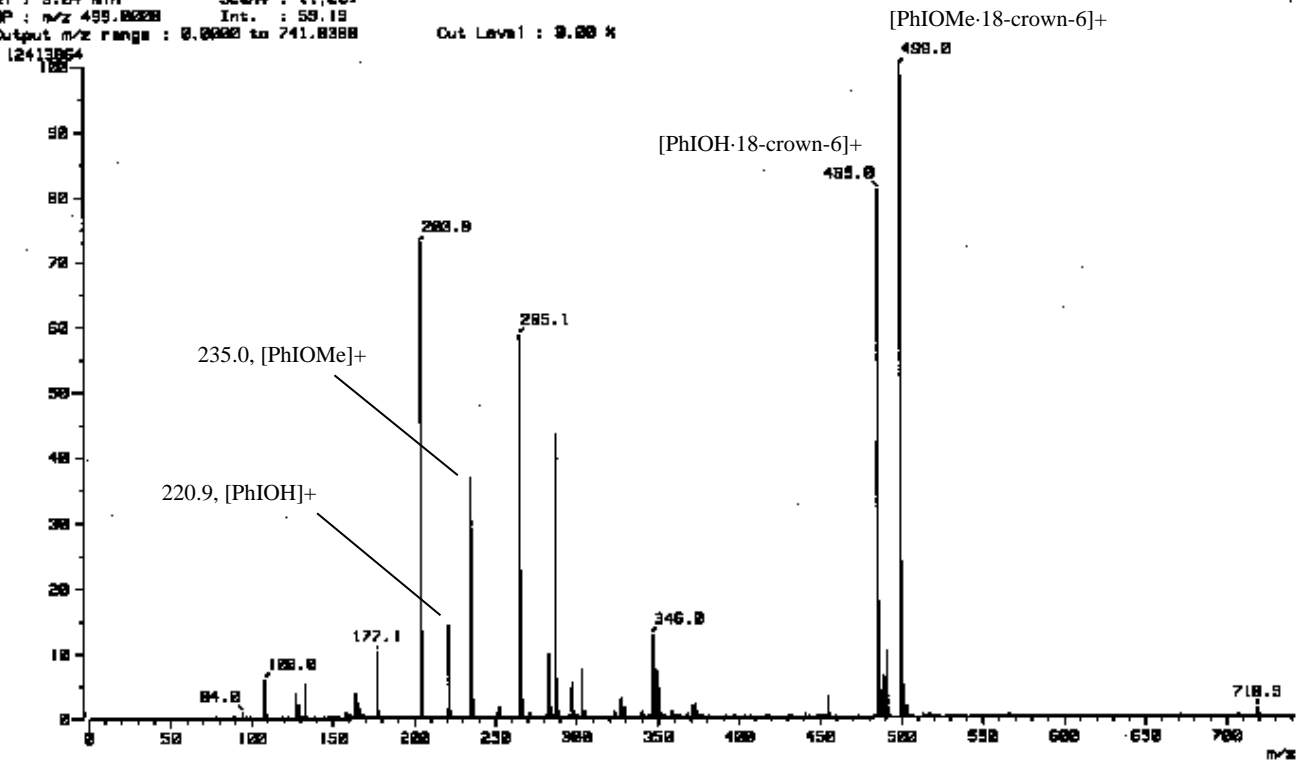

ESI mass spectrum of PhI(OH)BF<sub>4</sub>·18-crown-6 complex in MeOH
